# Supplementary material for: The genetic basis for individual differences in mRNA splicing and APOBEC1 editing activity in murine macrophages
Source: PubMed Central journal article supplement — Genome Res. 2014 Mar;24(3):377–89. doi: 10.1101/gr.166033.113 (PMC3941103; doi:10.1101/gr.166033.113), 2014-03
Supplement: supp_gr.166033.113_Hassan166033_Supplementary_Figure_1.pdf [file supp_gr.166033.113_Hassan166033_Supplementary_Figure_1.pdf]

Whole genome  
mRNA alignment

5'

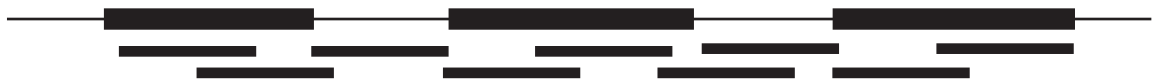

3'

1

Variant calling in individual  
RI, B6, and AJ mouse samples  
against the synthetic reference genome in  
each macrophage condition.

All sequence variants

2

Filter out all known  
Sanger AJ genomic  
SNPs

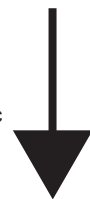

mRNA SNP variants

3

Filter out all SNPs with  
>2 alleles

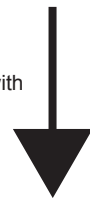

Bi-allelic SNPs

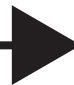

mRNA edited sites

4

Filter out SNPs not present  
in at least 7 samples
